# Supplementary material for: An efficient parallel method to compute lithostatic pressure in thermo-mechanical geodynamic models
Source: Copernicus journal article supplement (doi:10.5194/se-2022-7), 2022-01-28
Supplement: Supplementary file 3 [file se-2022-7-supplement.zip]

**Grid not aligned with gravity acceleration vector**

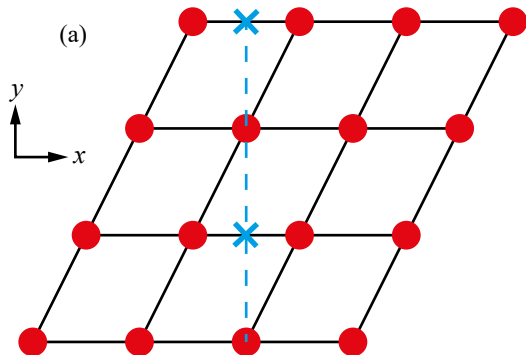

**Unstructured mesh**

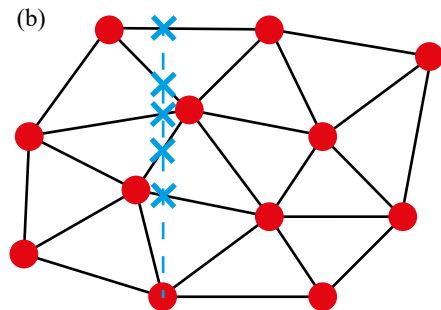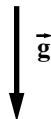

**Parallel grid decomposition**

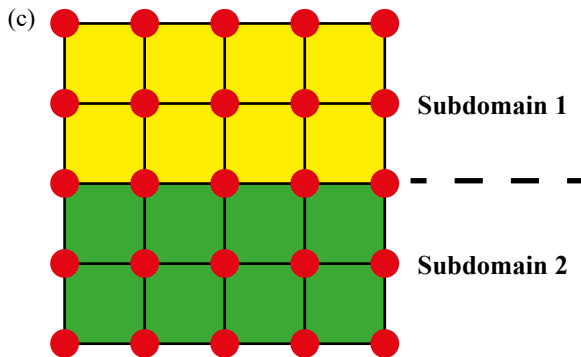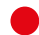

Grid nodes

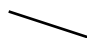

Grid representation

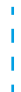

Path along which the integration must be performed  
(aligned with gravity acceleration vector)

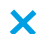

Off node location at which density needs to be evaluated  
for the integration (also requires to evaluate coordinates  
of these points)
