# Supplementary material for: An efficient parallel method to compute lithostatic pressure in thermo-mechanical geodynamic models
Source: Copernicus journal article supplement (doi:10.5194/se-2022-7), 2022-01-28
Supplement: Supplementary file 5 [file se-2022-7-supplement.zip]

Archive with 25 entries (22 files):
- fenics-2016_1_0/
- fenics-2016_1_0/demo_box_2domain.py
- fenics-2016_1_0/demo_circle.py
- Figures/
- Figures/Cross_sections-01.png
- Figures/Cross_sections.pdf
- Figures/Map_VZ_evolution-01.png
- Figures/Meshes_examples-01.png
- Figures/Meshes_examples.pdf
- Figures/Pressure_models-01.png
- Figures/Pressure_models.pdf
- Figures/RSR_evolution-01.png
- Figures/RSR_evolution.pdf
- Figures/Setup-01.png
- Figures/Setup.pdf
- Figures/Streamlines-01.png
- Figures/Streamlines.pdf
- gmsh/
- gmsh/box-2domain.geo
- gmsh/circle.geo
- ptatin-jourdon-may-2022.tgz
- 3D_rift_freeslip.opts
- 3D_rift_lithoP.opts
- ptatin_git_version.txt
- Figures/Map_VZ_evolution.pdf
