# Supplementary material for: An efficient parallel method to compute lithostatic pressure in thermo-mechanical geodynamic models
Source: Copernicus journal article supplement (doi:10.5194/se-2022-7), 2022-01-28
Supplement: Supplementary file 5 [file se-2022-7-supplement.zip › 3D_rift_lithoP.opts]

##  Using driver:
## ===============================================================
-nonlinear_driver_v1
### Model ###
-ptatin_model rift2subd # Used model
-activate_energyfv
-log_summary
-checkpoint_every_nsteps 50
-checkpoint_every_ncpumins 690
#-model_RiftSubd_output_markers
-output_path 3D_rift_lithoP
-model_RiftSubd_temperature_ic_from_file
########## BASIC NUMERICS ##############
-mx 256 # Number of elements along x
-my 64 # Number of elements along y
-mz 128 # Number of elements along z
-nsteps 10000000 # Max number of steps
#-dt_max 1e-3 # Max timestep allowed
#-dt_min 1e-8
-output_frequency 50
-dt_max_surface_displacement 5.0e-4
########### Markers #############
-lattice_layout_Nx 4
-lattice_layout_Ny 4
-lattice_layout_Nz 4
-mp_popctrl_np_lower 0
-mp_popctrl_np_upper 128
########### Box Geometry ################
#-model_RiftSubd_is_2D
-model_RiftSubd_Lx 10.0e+5  # Max length along x
-model_RiftSubd_Ly 0.0e+3 # Origin for y axis
-model_RiftSubd_Lz 6.0e+5 # Max length along z
-model_RiftSubd_Ox 0.0e+5 # Origin for x axis
-model_RiftSubd_Oy -4.5e+5 # Max depth along y axis
-model_RiftSubd_Oz 0.0e+5 # Origin for z axis
################ BCs ##################
#-model_RiftSubd_open_base
-model_RiftSubd_v_extension 1.0
-model_RiftSubd_bc_time 50.0,55.0,65.0,60.0
-model_RiftSubd_Ttop 0.0
-model_RiftSubd_Tbottom 1450.0
############### Geometry ###############
#-model_RiftSubd_wz_width
############ Phases Parameters #############
#### Continental upper crust phase number 0 ####
#### Quartzite Ranalli 1997 ####
-model_RiftSubd_preexpA_0 6.7e-6
-model_RiftSubd_Ascale_0 1.0e+6
-model_RiftSubd_entalpy_0 156.0e3
-model_RiftSubd_Vmol_0 0.0
-model_RiftSubd_nexp_0 2.4
-model_RiftSubd_Tref_0 273.15
-model_RiftSubd_phi_0 30.0
-model_RiftSubd_phi_inf_0 5.0
-model_RiftSubd_Co_0 2.0e+7
-model_RiftSubd_Co_inf_0 2.0e+7
-model_RiftSubd_Tens_cutoff_0 1.0e+7
-model_RiftSubd_Hst_cutoff_0 4.0e+8
-model_RiftSubd_eps_min_0 0.0
-model_RiftSubd_eps_max_0 1.0
-model_RiftSubd_alpha_0 3.0e-5
-model_RiftSubd_beta_0 0.0
-model_RiftSubd_rho_0 2700.0
-model_RiftSubd_heat_source_0 1.5e-6
-model_RiftSubd_conductivity_0 2.7
#### Continental lower crust phase number 1 ####
#### Anorthite Rybacki & Dresen 2000 ####
-model_RiftSubd_preexpA_1 13.4637
-model_RiftSubd_Ascale_1 1.0e+6
-model_RiftSubd_entalpy_1 345.e+3
-model_RiftSubd_Vmol_1 38.0e-6
-model_RiftSubd_nexp_1 3.0
-model_RiftSubd_Tref_1 273.15
-model_RiftSubd_phi_1 30.0
-model_RiftSubd_phi_inf_1 5.0
-model_RiftSubd_Co_1 2.0e+7
-model_RiftSubd_Co_inf_1 2.0e+7
-model_RiftSubd_Tens_cutoff_1 1.0e+7
-model_RiftSubd_Hst_cutoff_1 4.0e+8
-model_RiftSubd_eps_min_1 0.0
-model_RiftSubd_eps_max_1 1.0
-model_RiftSubd_alpha_1 3.0e-5
-model_RiftSubd_beta_1 1.0e-11
-model_RiftSubd_rho_1 2850.0
-model_RiftSubd_heat_source_1 0.3e-6
-model_RiftSubd_conductivity_1 2.85
#### Continental lithosphere mante phase number 2 ####
#### Dry peridotite Ranalli 1997 ####
-model_RiftSubd_preexpA_2 2.5e4
-model_RiftSubd_Ascale_2 1.0e+6
-model_RiftSubd_entalpy_2 532.0e3
-model_RiftSubd_Vmol_2 8.0e-6
-model_RiftSubd_nexp_2 3.5
-model_RiftSubd_Tref_2 273.15
-model_RiftSubd_phi_2 30.0
-model_RiftSubd_phi_inf_2 5.0
-model_RiftSubd_Co_2 3.0e+7
-model_RiftSubd_Co_inf_2 2.0e+7
-model_RiftSubd_Tens_cutoff_2 1.0e+7
-model_RiftSubd_Hst_cutoff_2 4.0e+8
-model_RiftSubd_eps_min_2 0.0
-model_RiftSubd_eps_max_2 1.0
-model_RiftSubd_alpha_2 3.0e-5
-model_RiftSubd_beta_2 1.0e-11
-model_RiftSubd_rho_2 3300.0
-model_RiftSubd_heat_source_2 0.0
-model_RiftSubd_conductivity_2 3.3
#### Asthenosphere phase number 3 ####
#### Dry peridotite Ranalli 1997 ####
-model_RiftSubd_preexpA_3 2.5e4
-model_RiftSubd_Ascale_3 1.0e+6
-model_RiftSubd_entalpy_3 532.0e3
-model_RiftSubd_Vmol_3 8.0e-6
-model_RiftSubd_nexp_3 3.5
-model_RiftSubd_Tref_3 273.15
-model_RiftSubd_phi_3 30.0
-model_RiftSubd_phi_inf_3 5.0
-model_RiftSubd_Co_3 2.0e+7
-model_RiftSubd_Co_inf_3 2.0e+7
-model_RiftSubd_Tens_cutoff_3 1.0e+7
-model_RiftSubd_Hst_cutoff_3 4.0e+8
-model_RiftSubd_eps_min_3 0.0
-model_RiftSubd_eps_max_3 1.0
-model_RiftSubd_alpha_3 3.0e-5
-model_RiftSubd_beta_3 1.0e-11
-model_RiftSubd_rho_3 3300.0
-model_RiftSubd_heat_source_3 0.0
-model_RiftSubd_conductivity_3 3.3
################ SOLVERS ################
-A11_operator_type 2,2,3,1
-dau_nlevels 4
-stk_velocity_dm_mat_type aij
-a11_op avx
#---- 4 MG lvl ----#
#| 256 x 64 x 128 |
#| 128 x 32 x 64 |
#| 64 x 16 x 32 |
#| 32 x 8 x 16 |
#------------------#
-stk_velocity_da_refine_hierarchy_x 2,2,2
-stk_velocity_da_refine_hierarchy_y 2,2,2
-stk_velocity_da_refine_hierarchy_z 2,2,2
#---- SNES ----#
-newton_its 0
-snes_atol 1e-3
-snes_max_it 5
-snes_rtol 1e-3
-snes_monitor
-snes_converged_reason
-snes_linesearch_type basic
#-snes_view
#---- KSP ----#
-ksp_max_it 200
-ksp_rtol 1.0e-4
-ksp_type fgmres
-pc_type fieldsplit
-pc_fieldsplit_schur_fact_type upper
-pc_fieldsplit_type schur
        #---- Fieldsplit p ----#
        -fieldsplit_p_ksp_type preonly
        -fieldsplit_p_pc_type bjacobi
        #---- Fieldsplit u ----#
        -fieldsplit_u_ksp_max_it 100
        -fieldsplit_u_ksp_monitor
        -fieldsplit_u_ksp_converged_reason
        -fieldsplit_u_ksp_rtol 1.0e-2
        -fieldsplit_u_ksp_type fgmres
        -fieldsplit_u_pc_type mg
        -fieldsplit_u_pc_mg_levels 4
        -fieldsplit_u_mg_levels_ksp_type gmres
        -fieldsplit_u_mg_levels_pc_type jacobi
        -fieldsplit_u_mg_levels_ksp_max_it 8
        -fieldsplit_u_mg_levels_ksp_norm_type NONE
                #---- Coarse Grid ----#
                # 32 x 8 x 16 #
                -fieldsplit_u_mg_coarse_pc_type dmdarepart
                -fieldsplit_u_mg_coarse_ksp_type preonly
                        #---- Coarse Grid KSP ----#
                        # 16 x 4 x 8 #
                        # 8 x 2 x 4 #
                        -fieldsplit_u_mg_coarse_pc_dmdarepart_factor 64
                        # From 1024 MPI ranks, now there are 1024/64 = 16 MPI ranks
                        -fieldsplit_u_mg_coarse_dmdarepart_pc_type mg
                        -fieldsplit_u_mg_coarse_dmdarepart_ksp_type preonly
                        -fieldsplit_u_mg_coarse_dmdarepart_pc_mg_levels 3
                        -fieldsplit_u_mg_coarse_dmdarepart_pc_mg_galerkin
                        -fieldsplit_u_mg_coarse_dmdarepart_mg_levels_ksp_type gmres
                        -fieldsplit_u_mg_coarse_dmdarepart_mg_levels_pc_type jacobi
                        -fieldsplit_u_mg_coarse_dmdarepart_mg_levels_ksp_max_it 6
                                #---- Coarse Coarse Grid ----#
                                # 8 x 2 x 4 #
                                -fieldsplit_u_mg_coarse_dmdarepart_mg_coarse_pc_type telescope
                                -fieldsplit_u_mg_coarse_dmdarepart_mg_coarse_telescope_pc_type cholesky
                                -fieldsplit_u_mg_coarse_dmdarepart_mg_coarse_pc_telescope_reduction_factor 16
#### THERMAL SOLVER
-ptatin_energyfv_nsub 2,2,2
#-energyfv_ksp_monitor
-energyfv_snes_converged_reason
-energyfv_ksp_type fgmres
-energyfv_snes_ksp_ew
-energyfv_snes_ksp_ew_rtol0 1.0e-2
-energyfv_snes_ksp_ew_version 1
-energyfv_snes_lag_preconditioner -2
-energyfv_snes_monitor
-energyfv_snes_rtol 1.0e-6
-energyfv_mg_levels_esteig_ksp_norm_type none
-energyfv_mg_levels_esteig_ksp_type cg
-energyfv_mg_levels_ksp_chebyshev_esteig 0,0.01,0,1.1
-energyfv_mg_levels_ksp_max_it 8
#-energyfv_mg_levels_ksp_norm_type none
-energyfv_mg_levels_ksp_type gmres #chebyshev
-energyfv_mg_levels_pc_type bjacobi
-energyfv_pc_type gamg
-fvpp_ksp_monitor
-fvpp_ksp_rtol 1.0e-10
-fvpp_ksp_type cg
-fvpp_mg_coarse_pc_type redundant
-fvpp_mg_coarse_redundant_pc_factor_mat_solver_type gamg #mkl_pardiso
-fvpp_mg_coarse_redundant_pc_type gamg
-fvpp_mg_levels_esteig_ksp_norm_type none
-fvpp_mg_levels_esteig_ksp_type cg
-fvpp_mg_levels_ksp_chebyshev_esteig 0,0.01,0,1.1
-fvpp_mg_levels_ksp_max_it 4
-fvpp_mg_levels_ksp_norm_type none
-fvpp_mg_levels_ksp_type chebyshev
-fvpp_mg_levels_pc_type jacobi
-fvpp_operator_fvspace false
-fvpp_pc_type gamg
### Solver for lithostatic pressure
-LP_snes_atol 1.0e-6
-LP_snes_rtol 1.0e-6
#-LP_snes_max_it 10
-LP_snes_monitor
#-LP_ksp_monitor
-LP_ksp_atol 1.0e-6
-LP_ksp_rtol 1.0e-6
-LP_ksp_type fgmres
#-LP_snes_mf_operator
-LP_pc_type bjacobi #gamg #lu not parallel
#-LP_snes_type ksponly
-LP_snes_ksp_ew
-LP_snes_ksp_ew_rtol0 1.0e-2
-LP_snes_ksp_ew_version 1
-LP_snes_lag_preconditioner -2
