# Supplementary material for: An efficient parallel method to compute lithostatic pressure in thermo-mechanical geodynamic models
Source: Copernicus journal article supplement (doi:10.5194/se-2022-7), 2022-01-28
Supplement: Supplementary file 5 [file se-2022-7-supplement.zip › gmsh/box-2domain.geo]

DefineConstant[ h = {0.1, Min 0, Max 1, Name "Domain resolution" } ]
DefineConstant[ ly = {0.6, Min 0.1, Max 0.9, Name "Side point" } ]
SetFactory("OpenCASCADE")
Point(1) = {0, 0, 0, h}
Point(2) = {1, 0, 0, h}
Point(3) = {1, 1, 0, h}
Point(4) = {0, 1, 0, h}
Point(5) = {0, 0.5, 0, h}
Point(6) = {1, ly, 0, h}
Line(1) = {1,2}
Line(2) = {2,6}
Line(3) = {6,3}
Line(4) = {3,4}
Line(5) = {4,5}
Line(6) = {5,1}
Line(7) = {5,6}
Line Loop(5) = {1, 2, -7, 6}
Line Loop(6) = {7, 3, 4, 5}
Plane Surface(5) = {5}
Plane Surface(6) = {6}
Physical Curve(1) = {1}	// bottom : tag 1
Physical Curve(2) = {2,3,5,6}	// left right : tag 2
Physical Curve(3) = {4}	// top : tag 3
Physical Surface(1) = {5}	// volume (lower) : tag 1
Physical Surface(2) = {6}	// volume (upper) : tag 2
Mesh.MshFileVersion = 2.2
