# Supplementary material for: An efficient parallel method to compute lithostatic pressure in thermo-mechanical geodynamic models
Source: Copernicus journal article supplement (doi:10.5194/se-2022-7), 2022-01-28
Supplement: Supplementary file 5 [file se-2022-7-supplement.zip › gmsh/circle.geo]

DefineConstant[ h = {0.1, Min 0, Max 1, Name "Domain resolution" } ];

SetFactory("OpenCASCADE");


Circle(1) = {0, 0, 0, 2, 0, 2*Pi};

Line Loop(2) = {1};
Plane Surface(3) = {2};

MeshSize{ PointsOf{Surface{3};} } = h;

Physical Curve(1) = {1}; // exterior has tag 1
Physical Surface(1) = {3}; // volume has tag 1

Mesh.MshFileVersion = 2.2;
