# Supplementary material for: An efficient parallel method to compute lithostatic pressure in thermo-mechanical geodynamic models
Source: Copernicus journal article supplement (doi:10.5194/se-2022-7), 2022-01-28
Supplement: Supplementary file 5 [file se-2022-7-supplement.zip › ptatin_git_version.txt]

commit c6372bdfd3140300db8f1cfc9bf6649e7c484c1b
Author: Anthony_Jourdon <jourdon_anthony@hotmail.fr>
Date:   Sat Nov 27 22:50:39 2021 +0100

    Add the traction term evaluation into the non linear iterations
