# Supplementary material for: An efficient parallel method to compute lithostatic pressure in thermo-mechanical geodynamic models
Source: Copernicus journal article supplement (doi:10.5194/se-2022-7), 2022-01-28

**2D half annulus**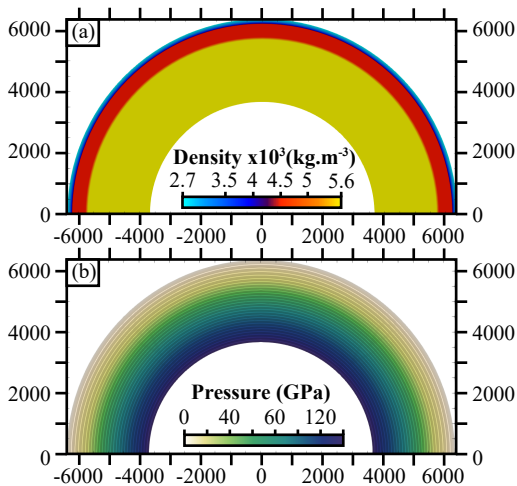**2D sheared rectangle**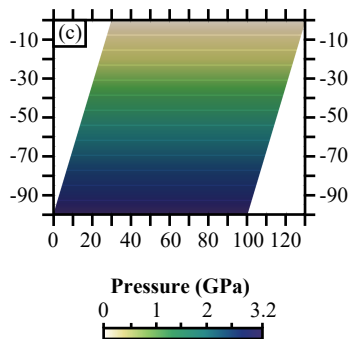**3D rift with free surface and parallel partitioning****Density  $\times 10^3 (\text{kg.m}^{-3})$** 

2.7 3.0 3.3 3.6

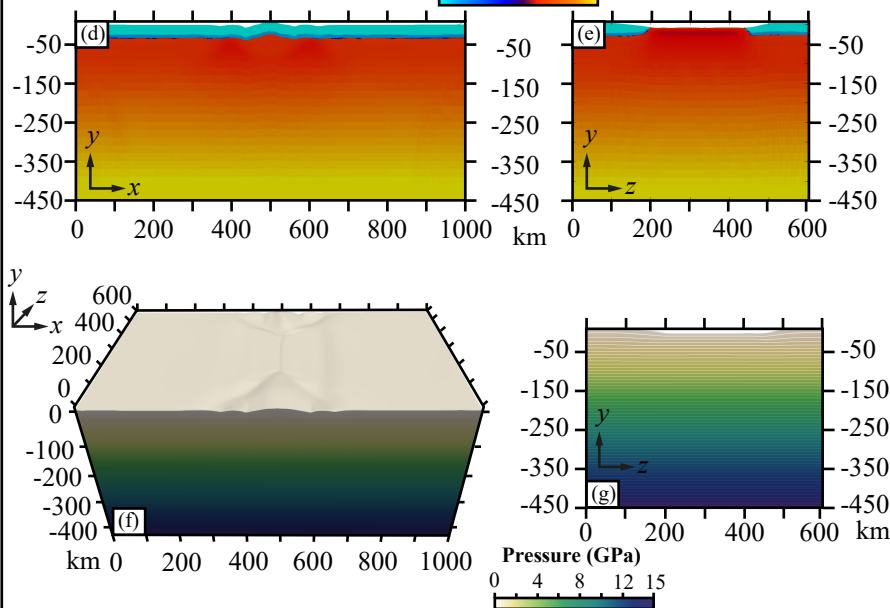

Supplement: Supplementary file 13 [file se-2022-7-supplement.zip]
