# Supplementary figures and images for: An efficient parallel method to compute lithostatic pressure in thermo-mechanical geodynamic models
Source: Copernicus journal article supplement (doi:10.5194/se-2022-7), 2022-01-28

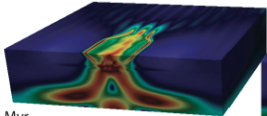

5 Myr

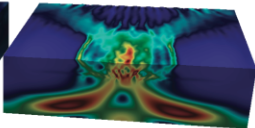

10 Myr

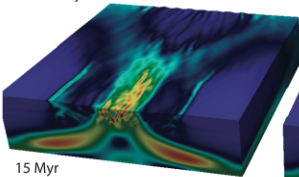

15 Myr

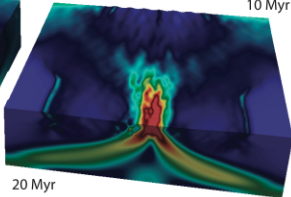

20 Myr

Supplement: Supplementary file 1 [file se-2022-7-supplement.zip]

## Free-slip BC

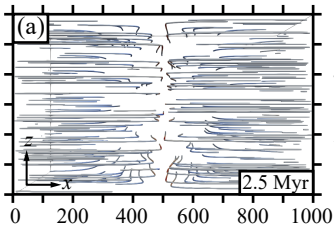

## Lithostatic pressure BC

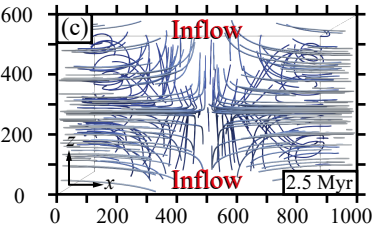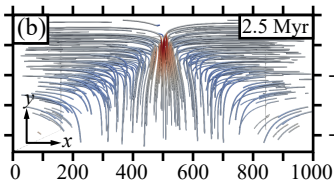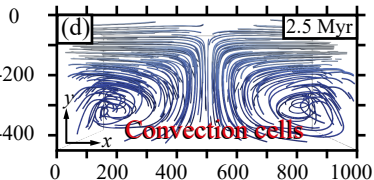

Supplement: Supplementary file 2 [file se-2022-7-supplement.zip]

Free-slip model

Lithostatic pressure model

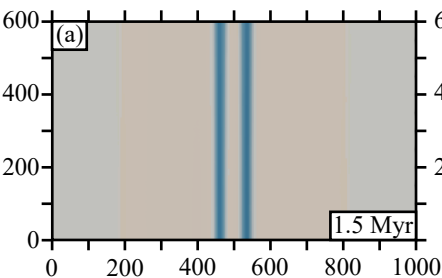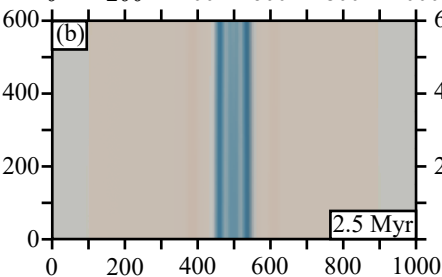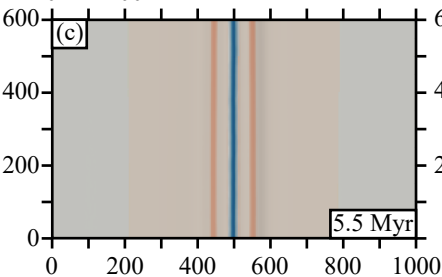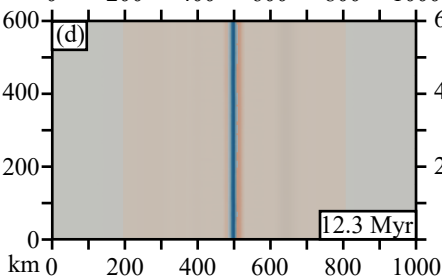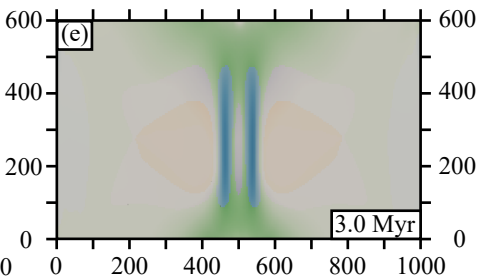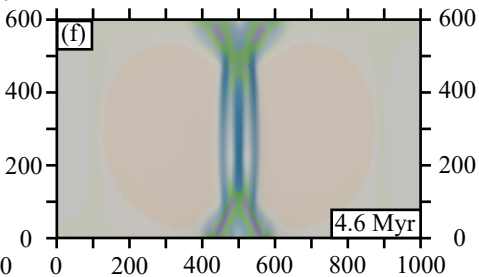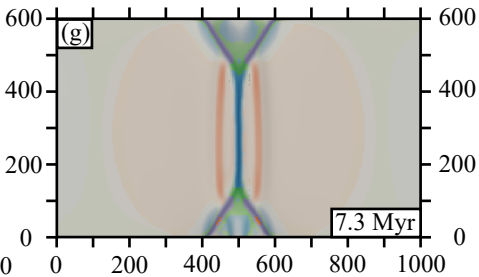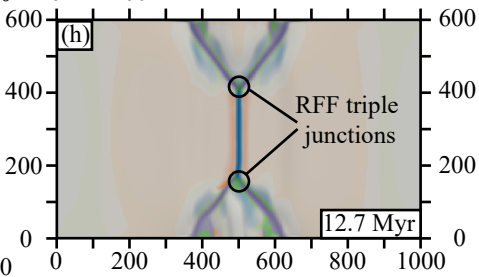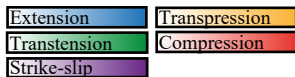

Supplement: Supplementary file 4 [file se-2022-7-supplement.zip]

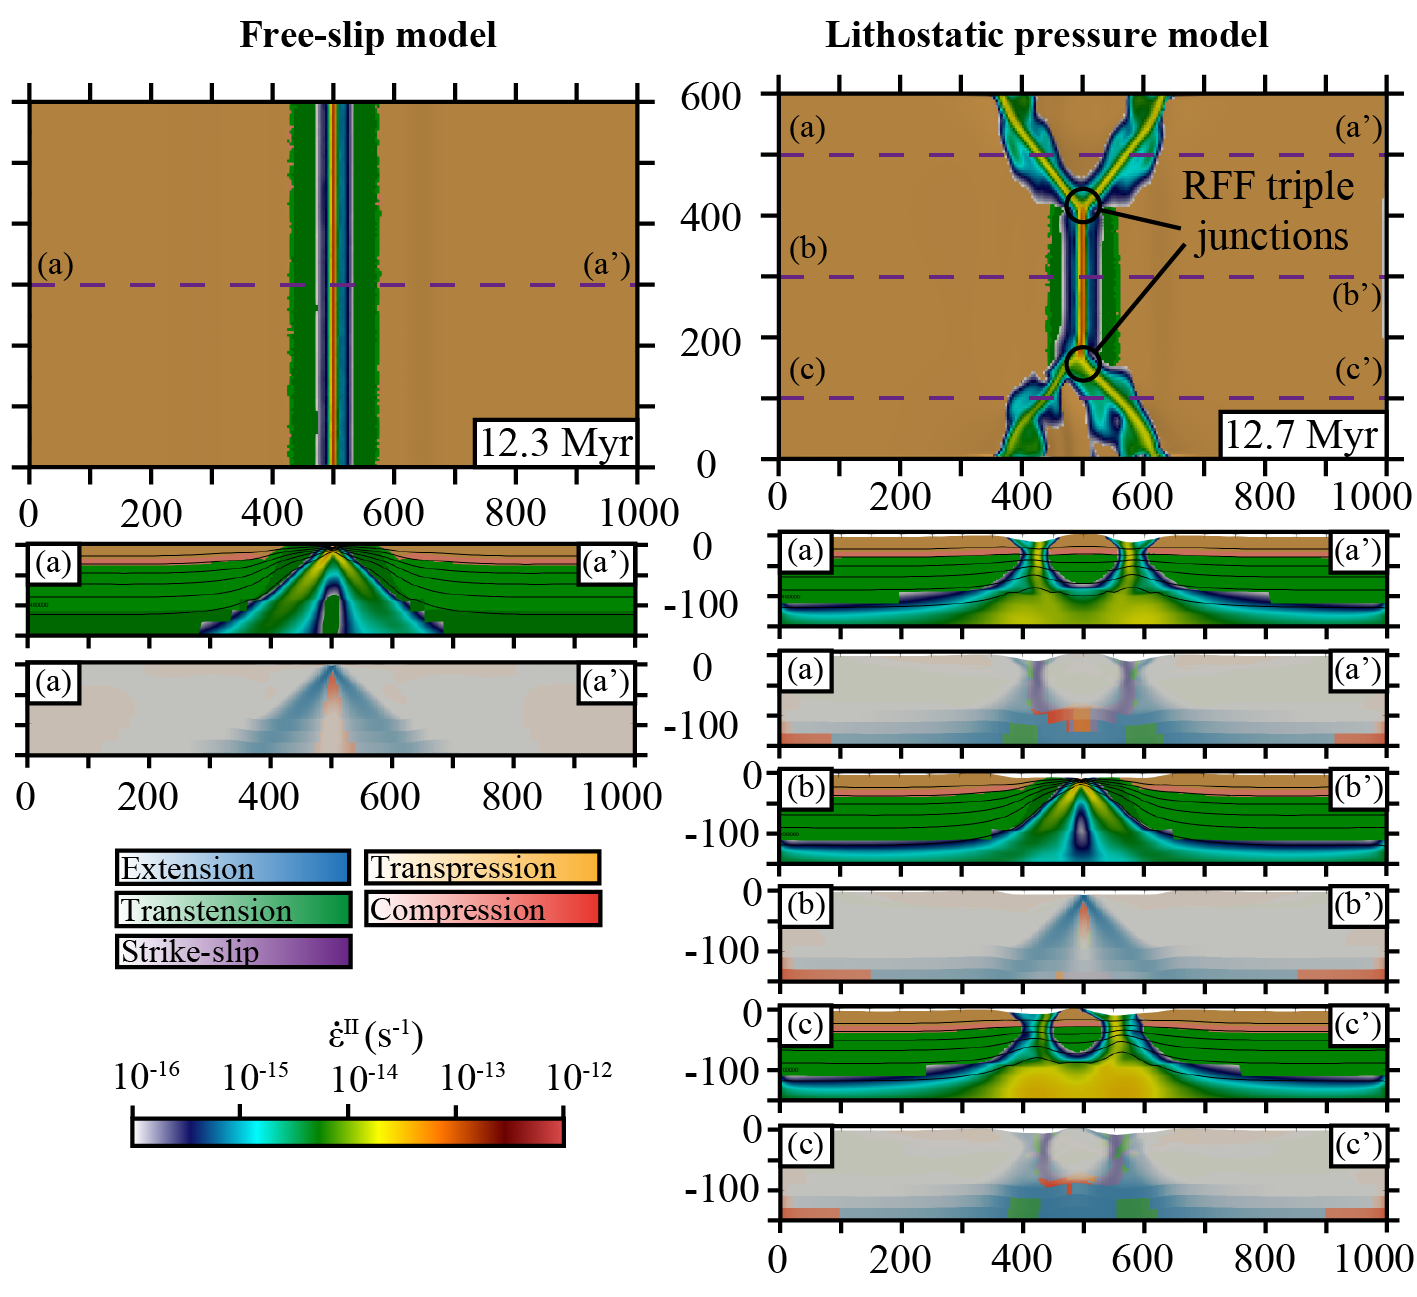

Supplement: Supplementary file 5 [file se-2022-7-supplement.zip › Figures/Cross_sections-01.png]

# Free-slip model

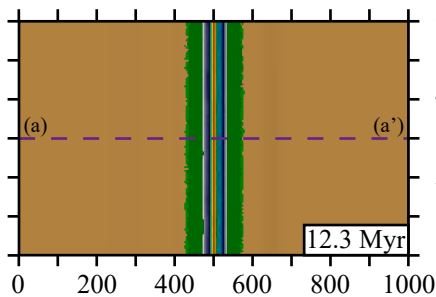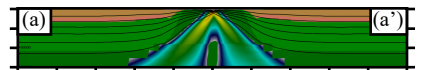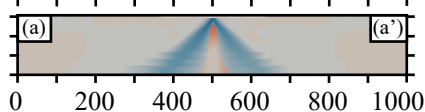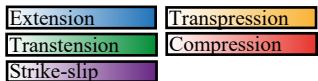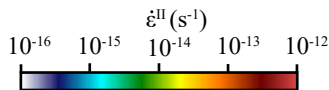

# Lithostatic pressure model

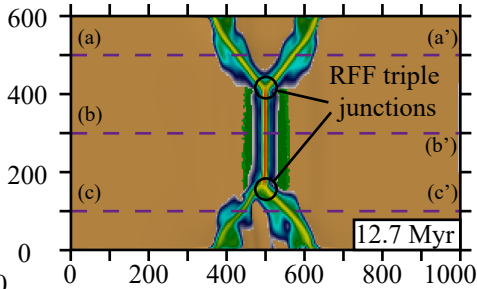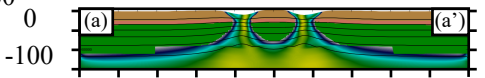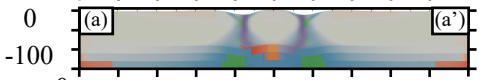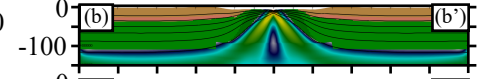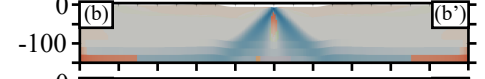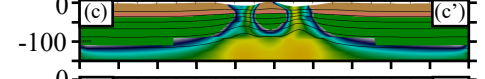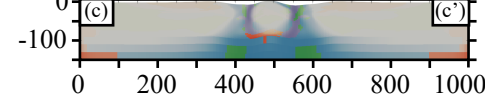

Supplement: Supplementary file 5 [file se-2022-7-supplement.zip › Figures/Cross_sections.pdf]

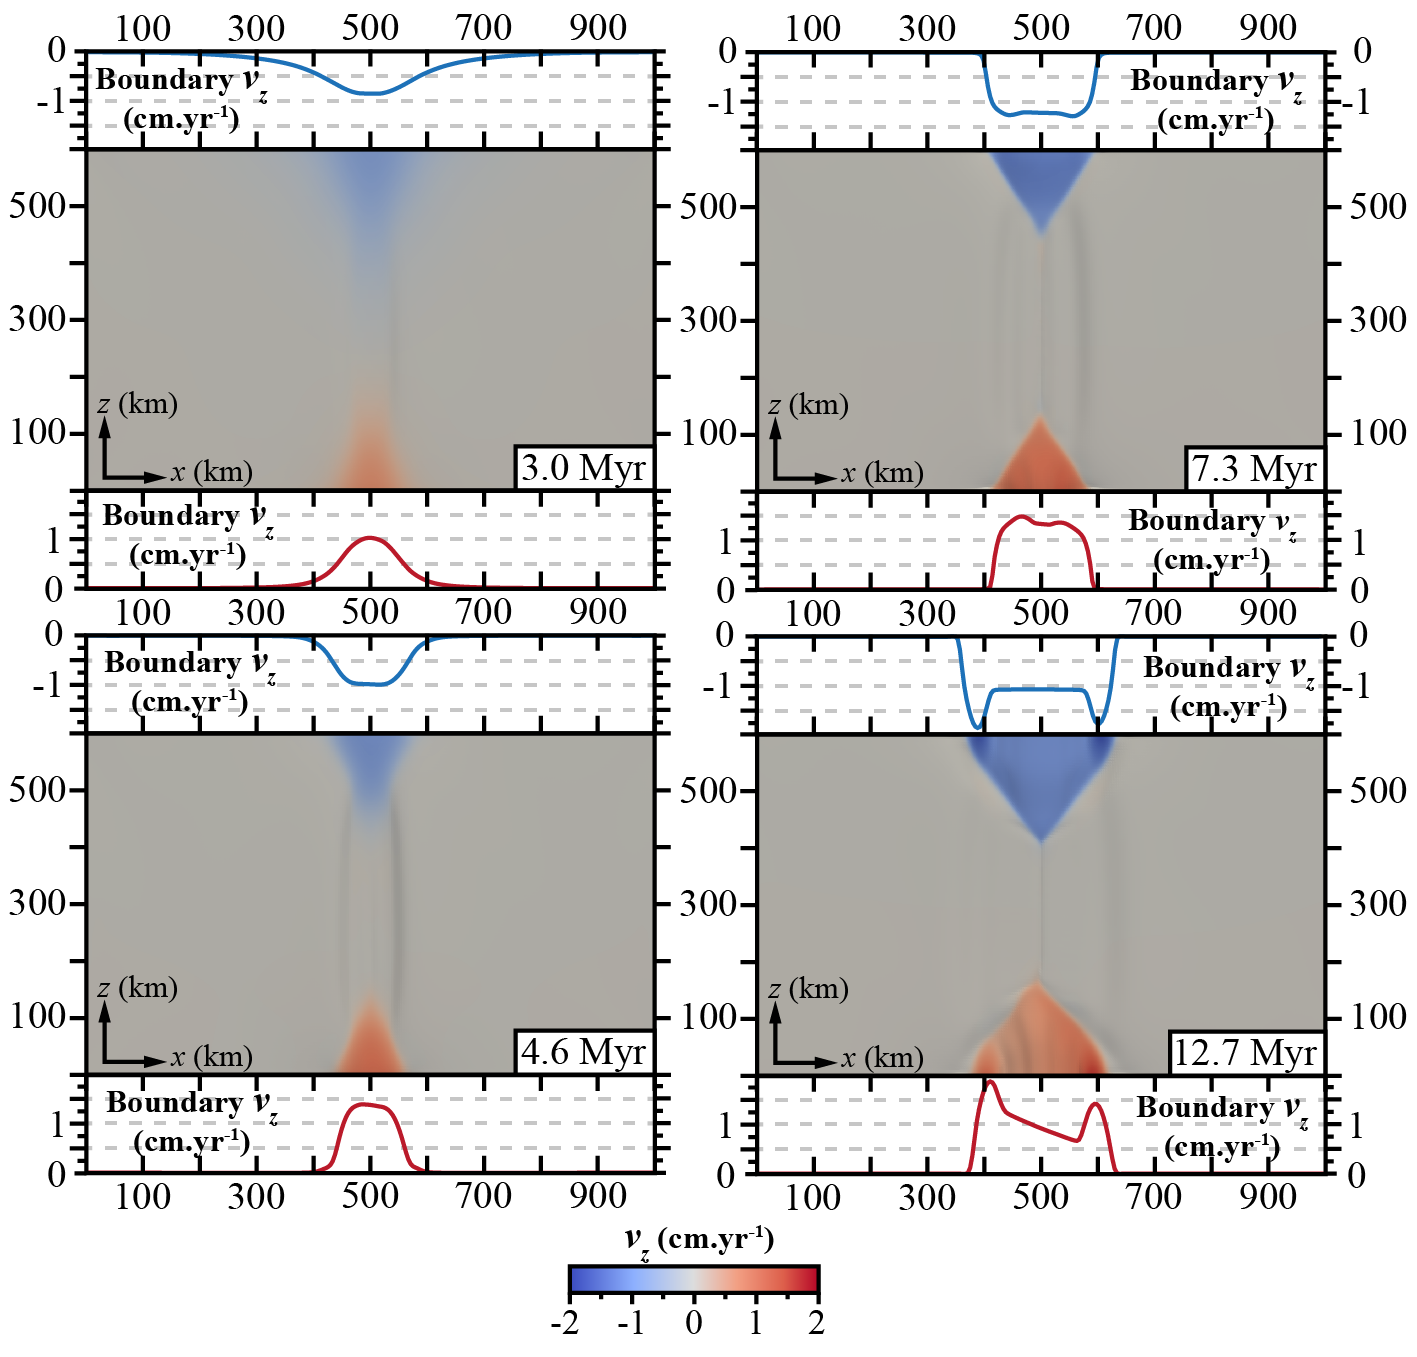

Supplement: Supplementary file 5 [file se-2022-7-supplement.zip › Figures/Map_VZ_evolution-01.png]

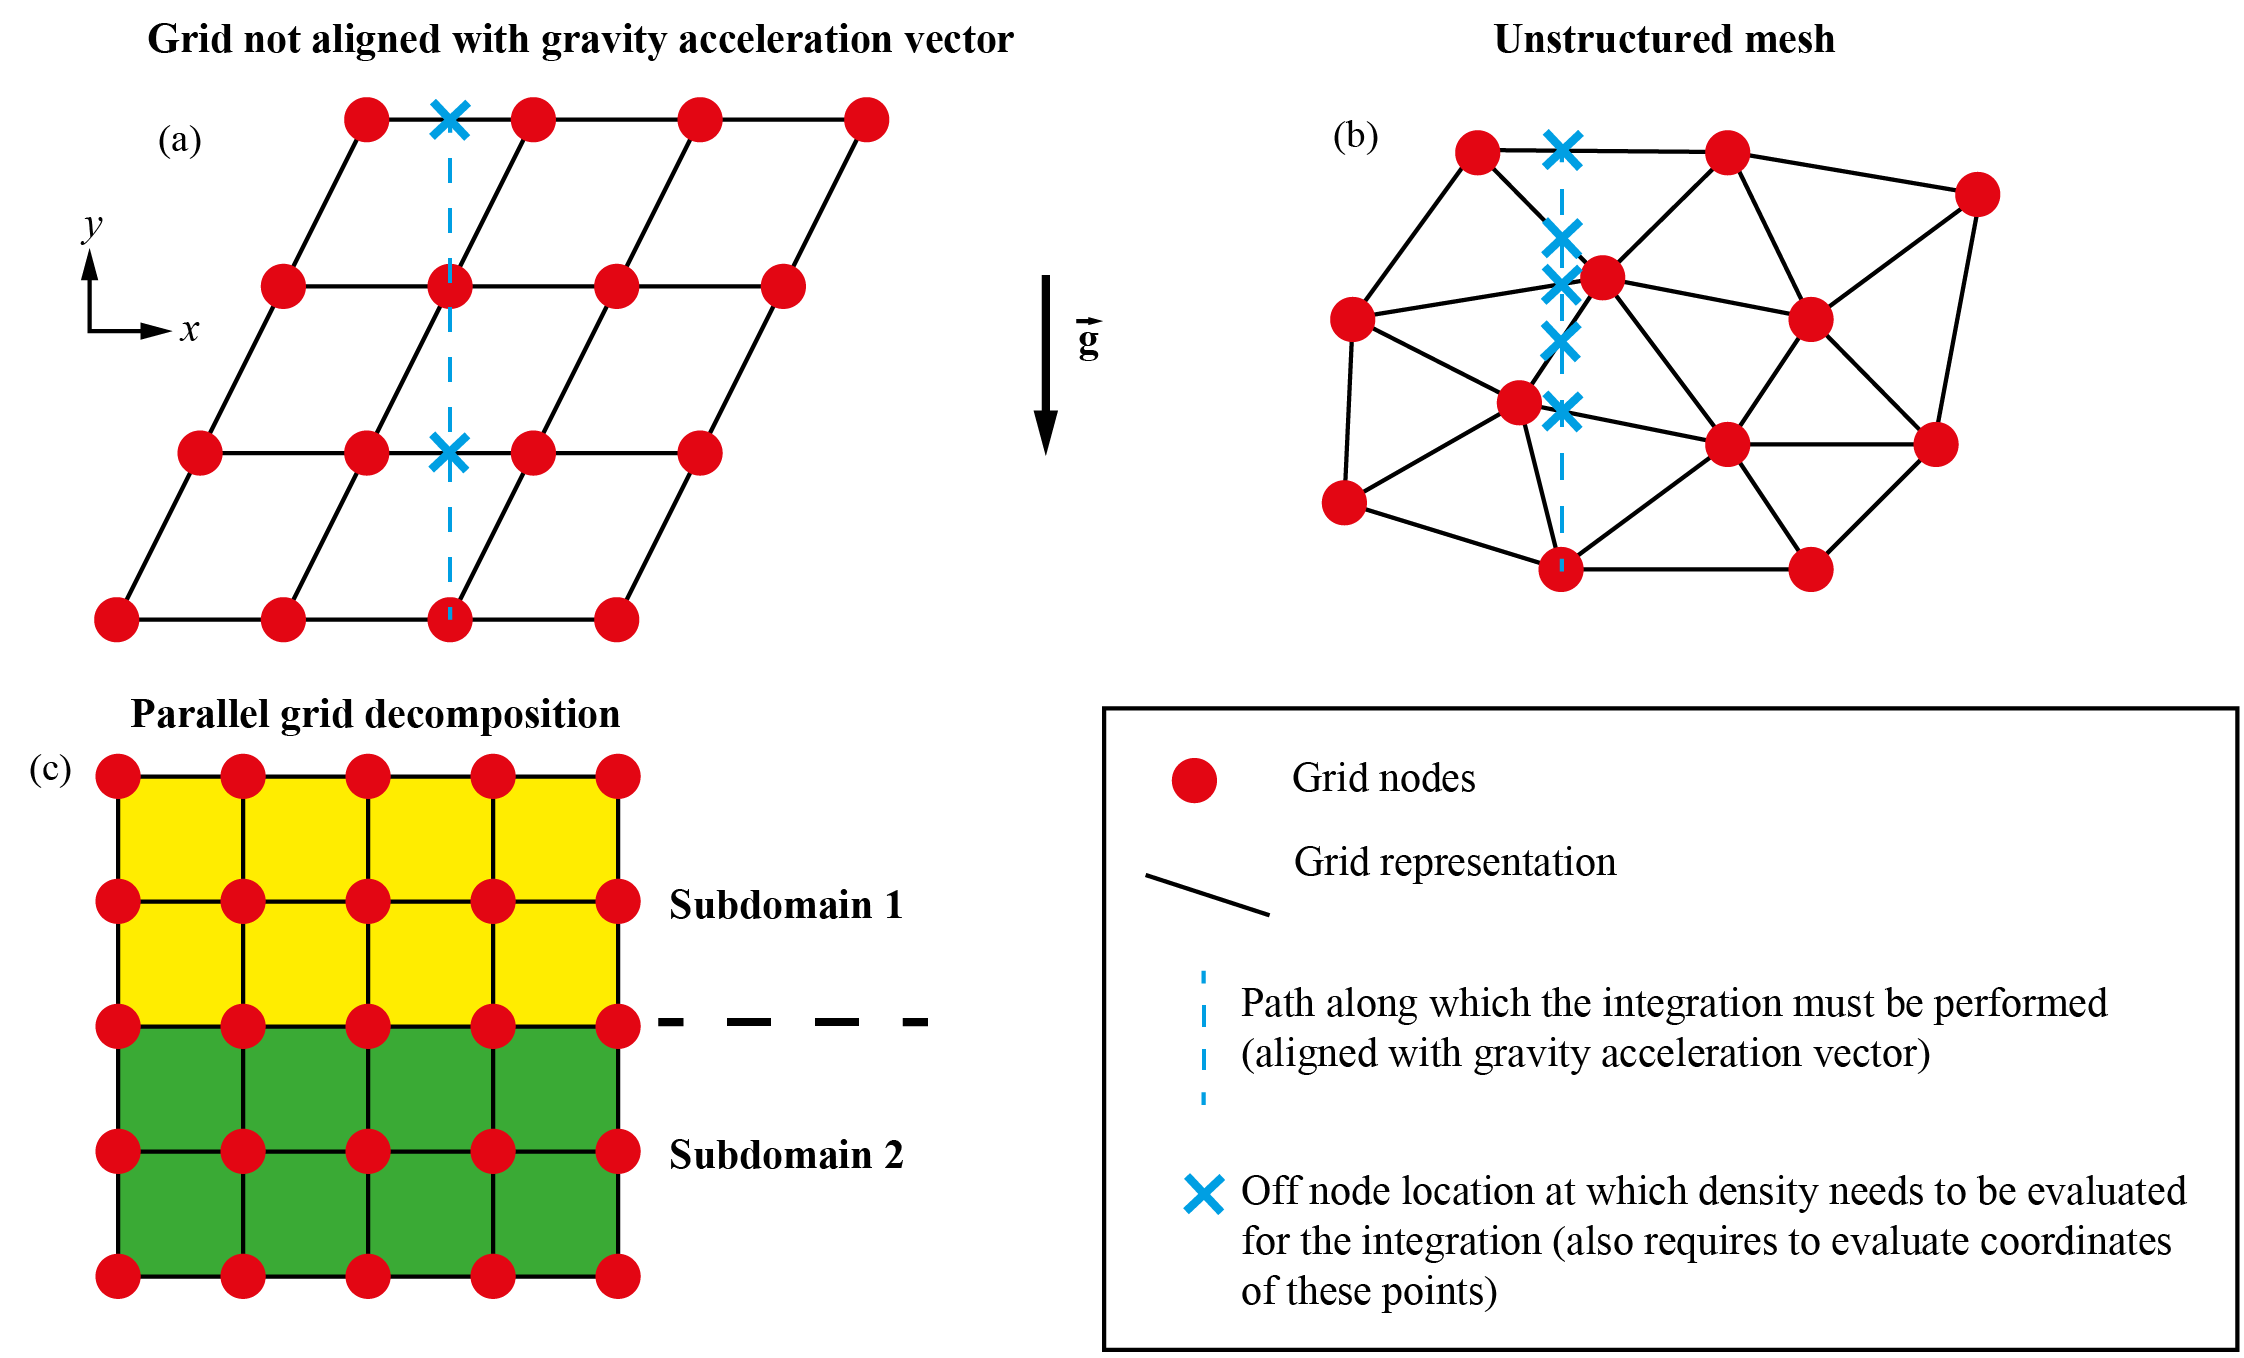

Supplement: Supplementary file 5 [file se-2022-7-supplement.zip › Figures/Meshes_examples-01.png]

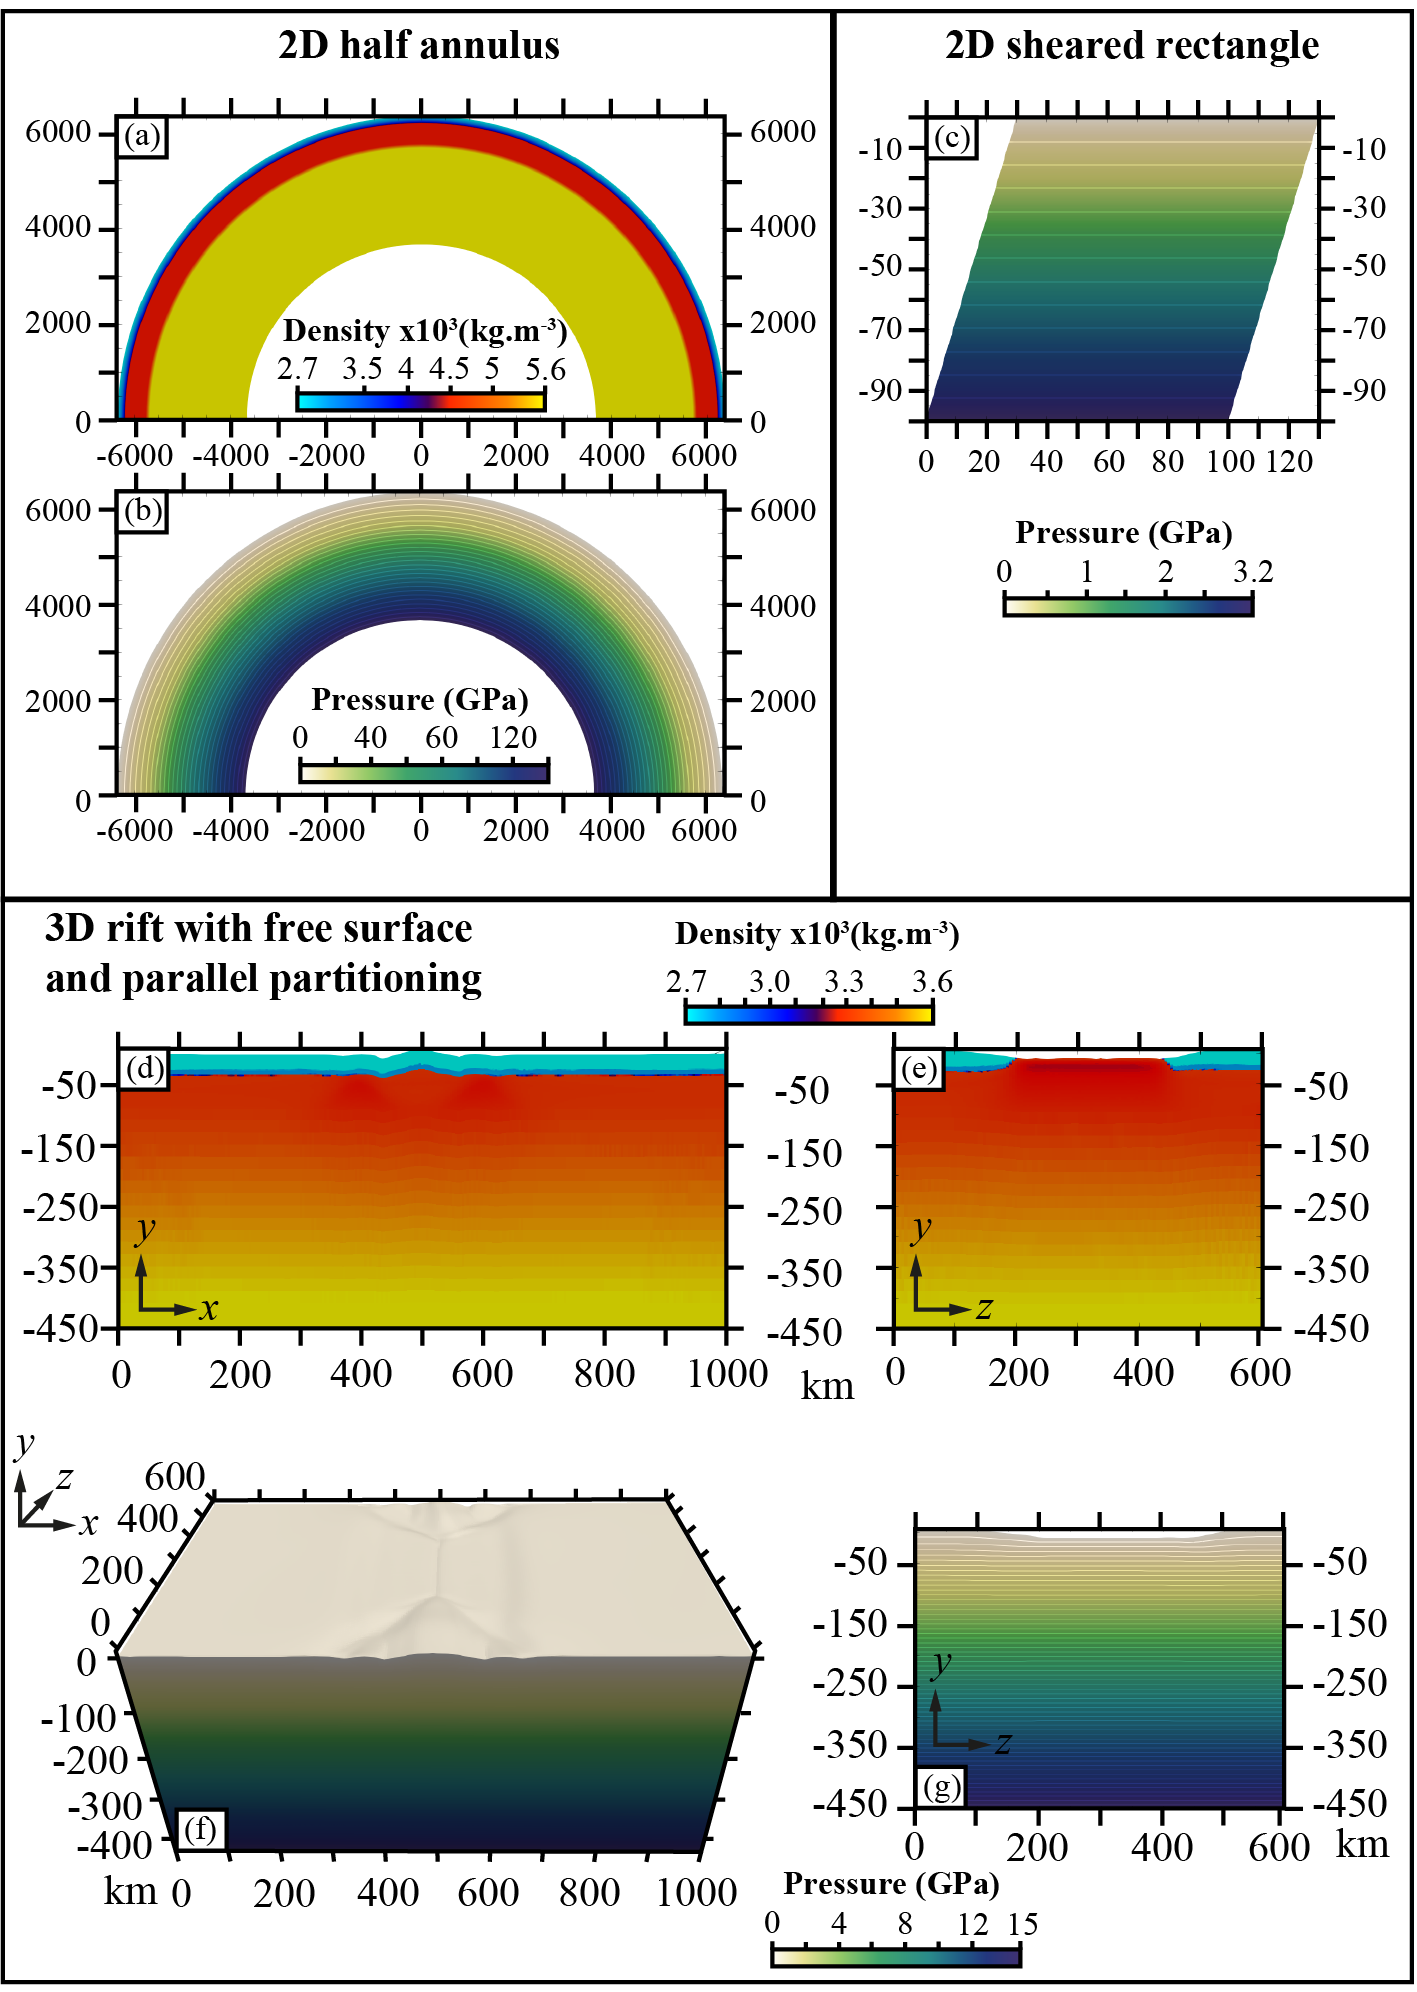

Supplement: Supplementary file 5 [file se-2022-7-supplement.zip › Figures/Pressure_models-01.png]

**2D half annulus**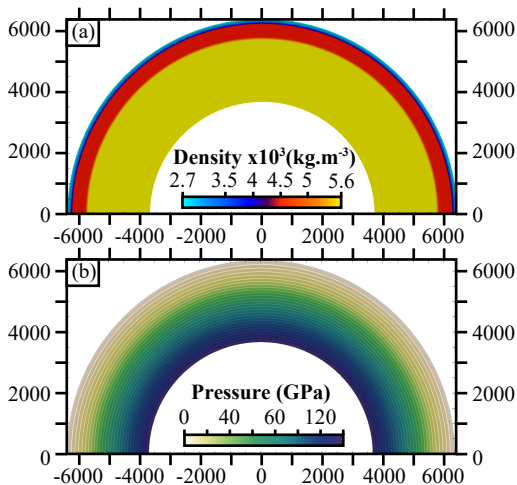**2D sheared rectangle**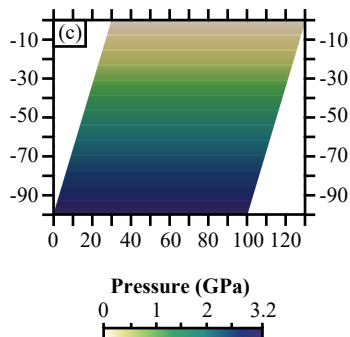**3D rift with free surface and parallel partitioning**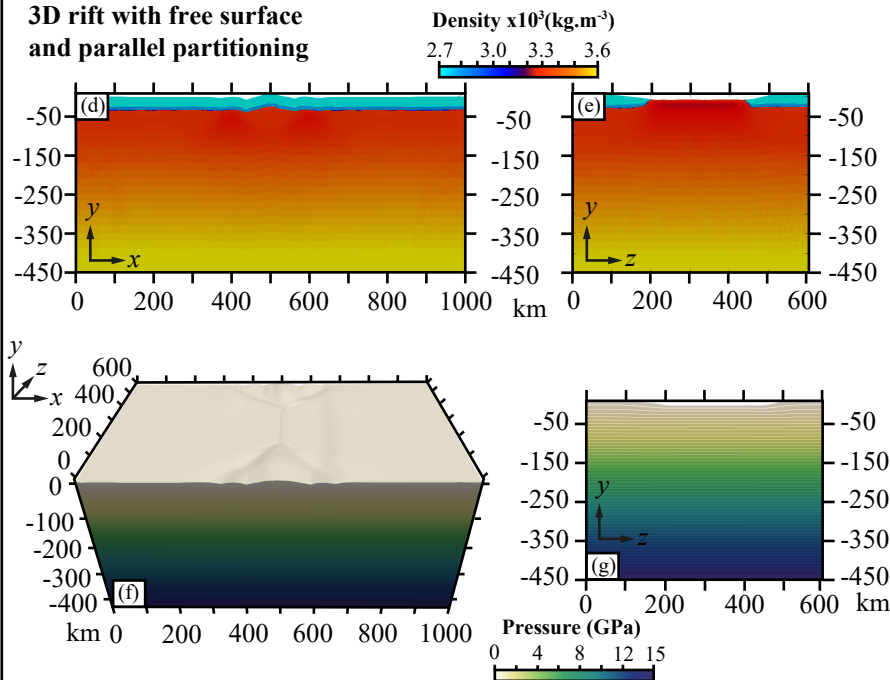

Supplement: Supplementary file 5 [file se-2022-7-supplement.zip › Figures/Pressure_models.pdf]

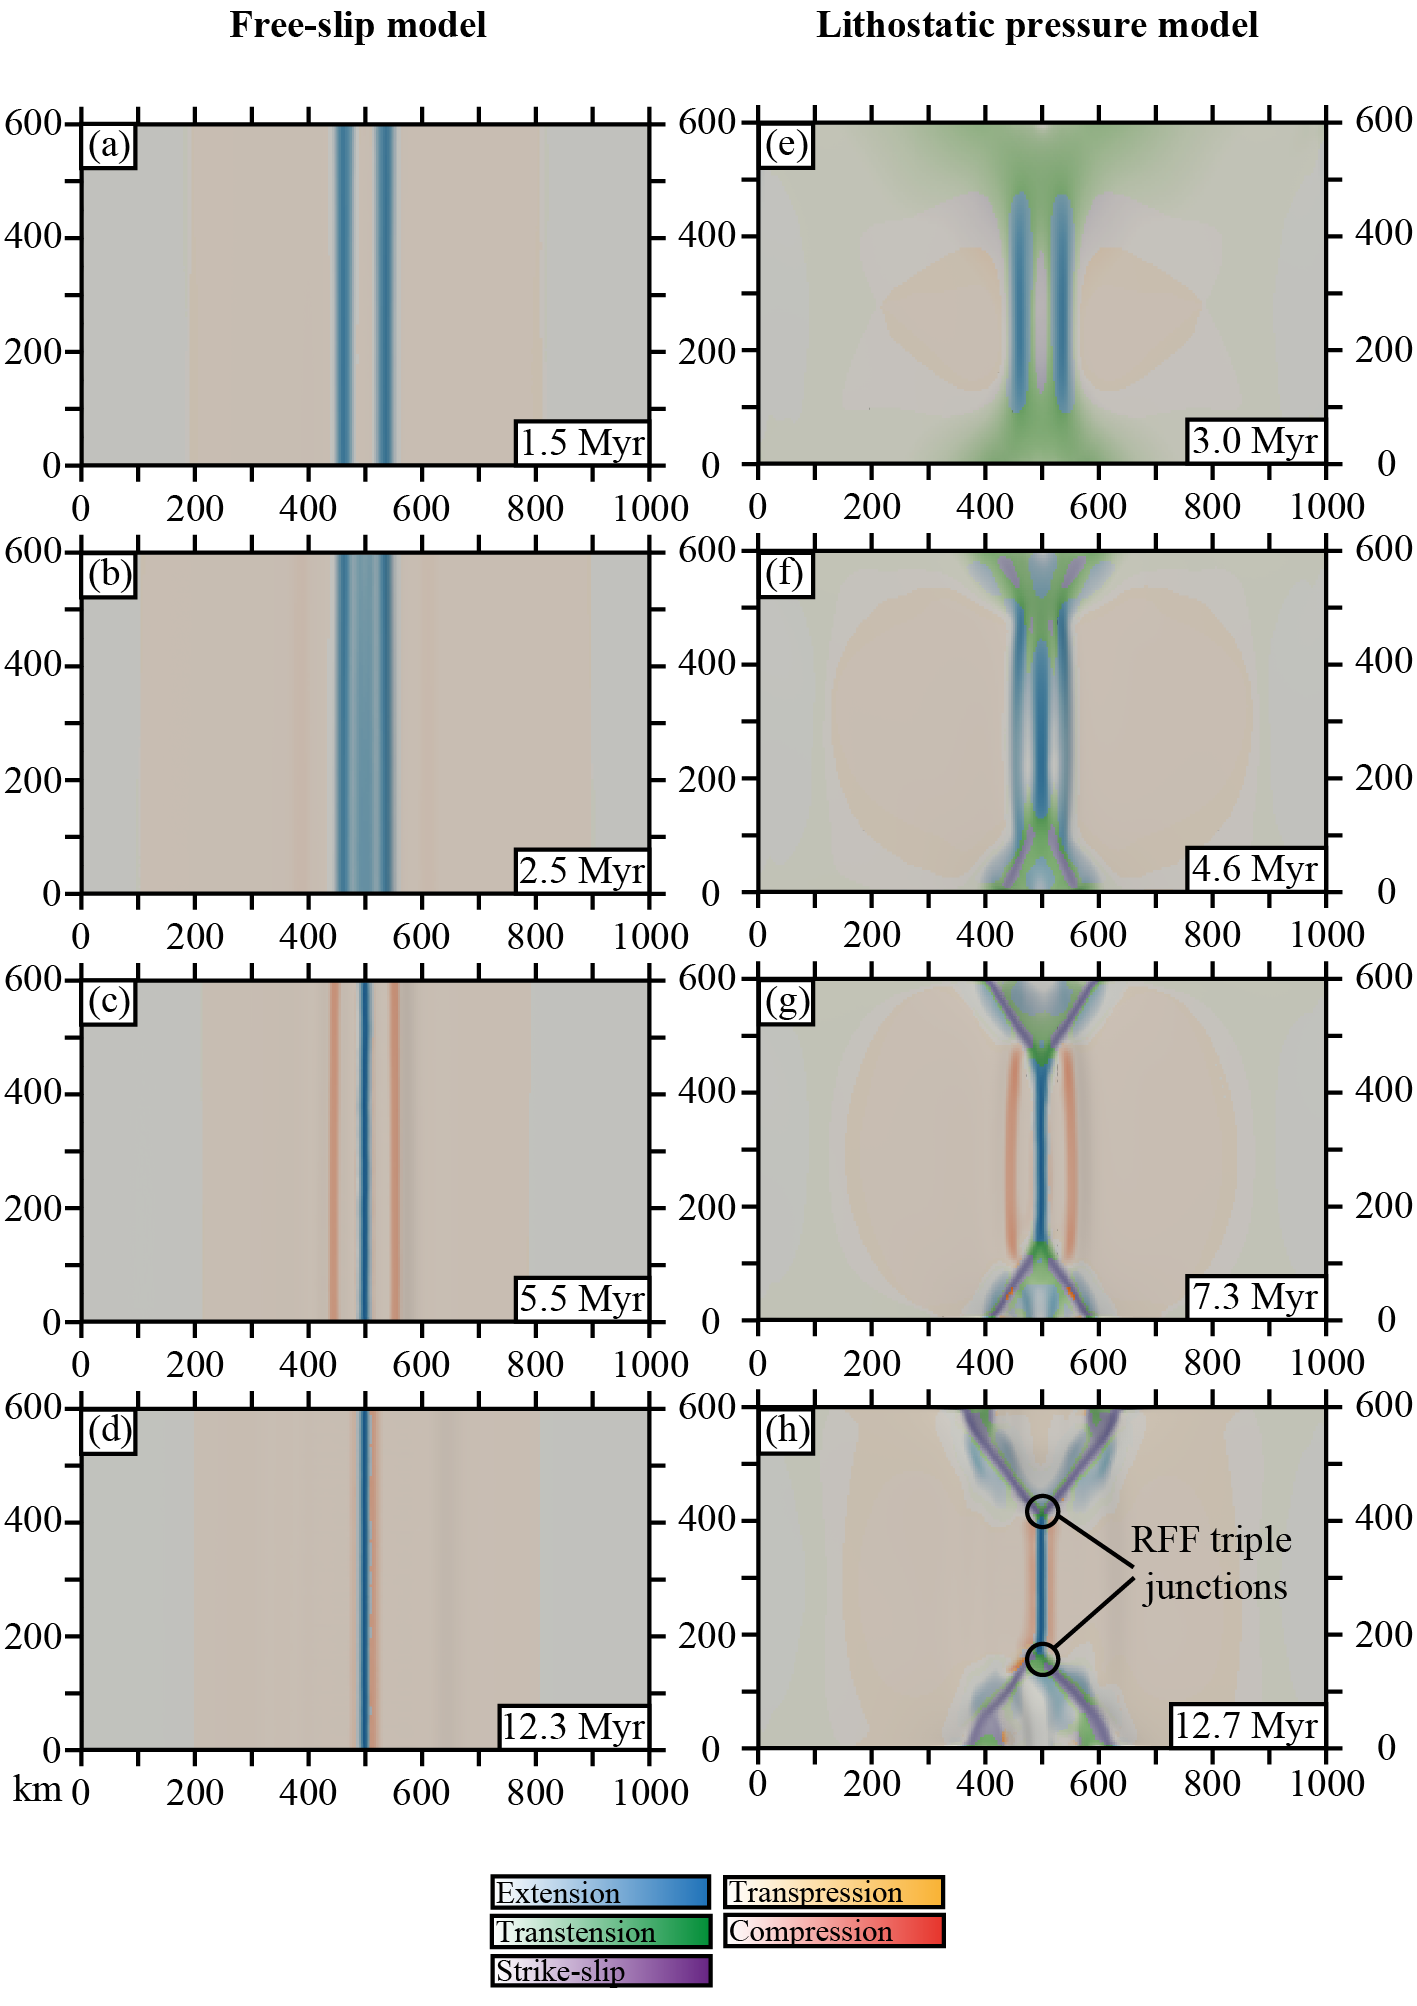

Supplement: Supplementary file 5 [file se-2022-7-supplement.zip › Figures/RSR_evolution-01.png]

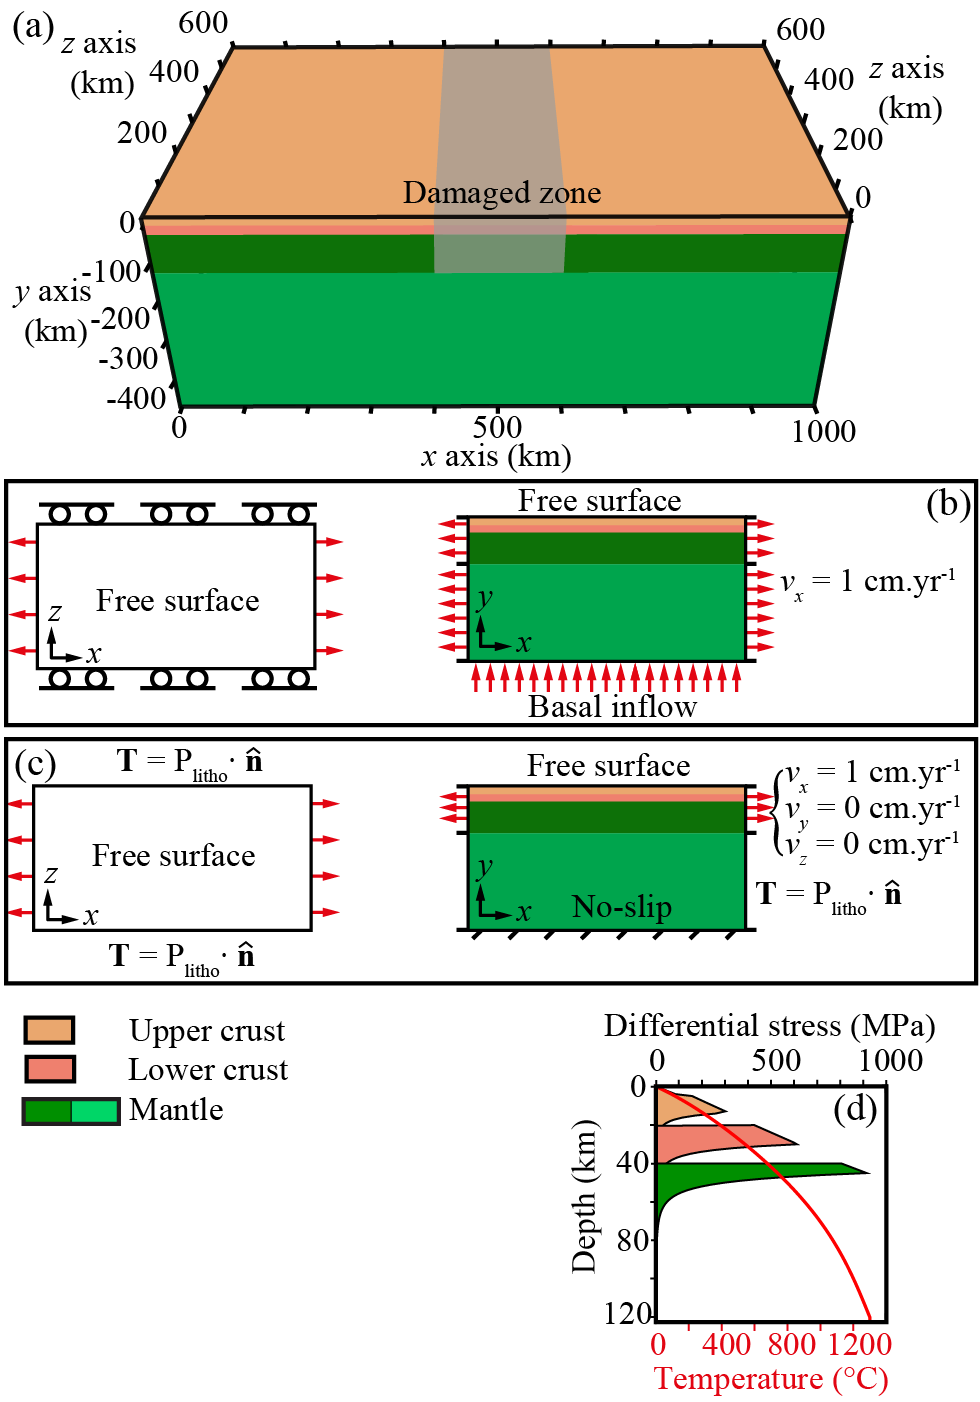

Supplement: Supplementary file 5 [file se-2022-7-supplement.zip › Figures/Setup-01.png]

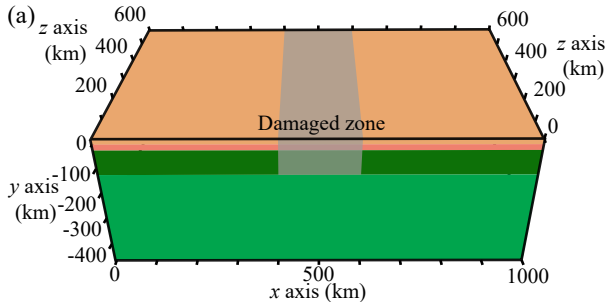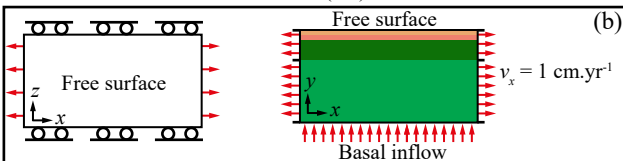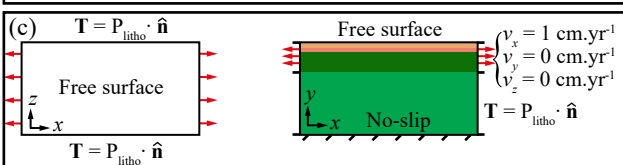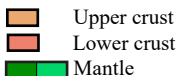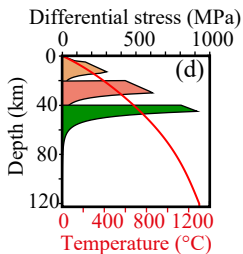

Supplement: Supplementary file 5 [file se-2022-7-supplement.zip › Figures/Setup.pdf]

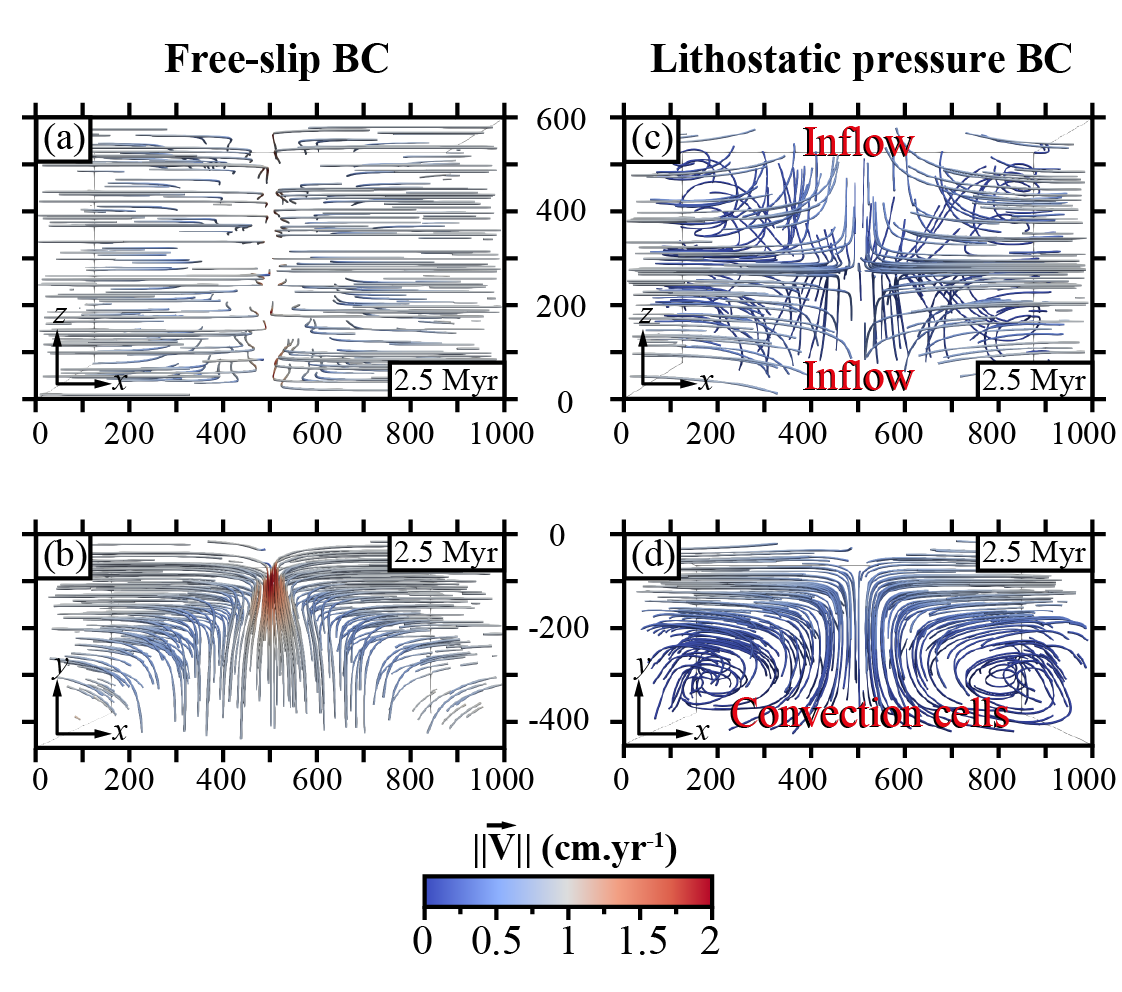

Supplement: Supplementary file 5 [file se-2022-7-supplement.zip › Figures/Streamlines-01.png]

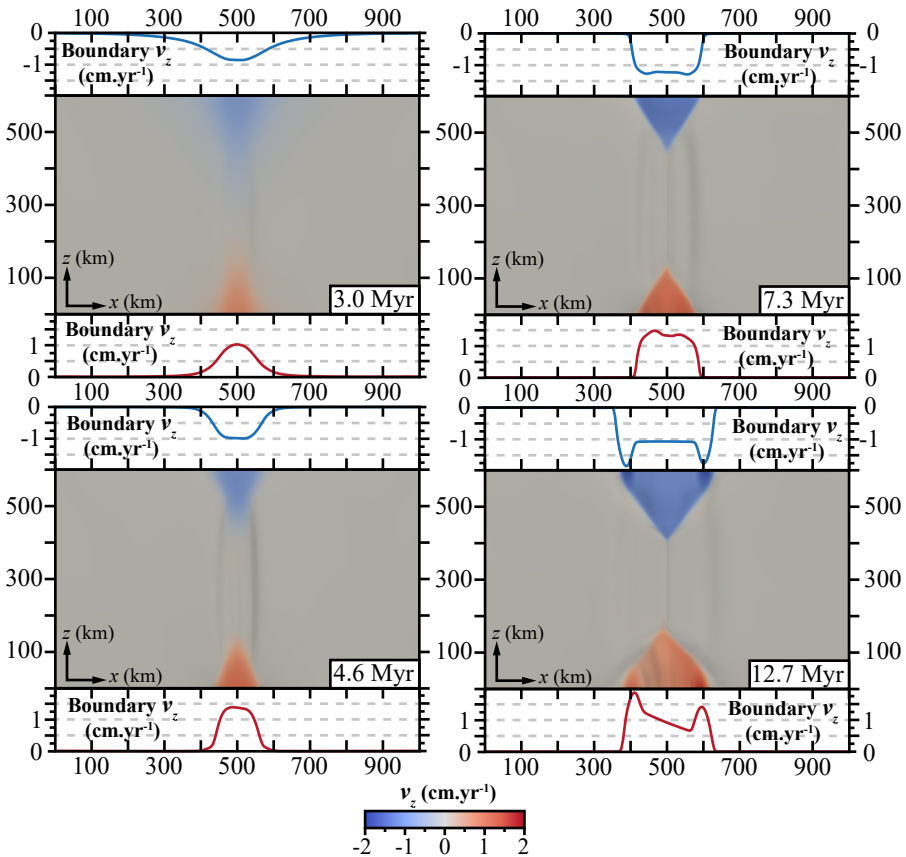

Supplement: Supplementary file 5 [file se-2022-7-supplement.zip › Figures/Map_VZ_evolution.pdf]

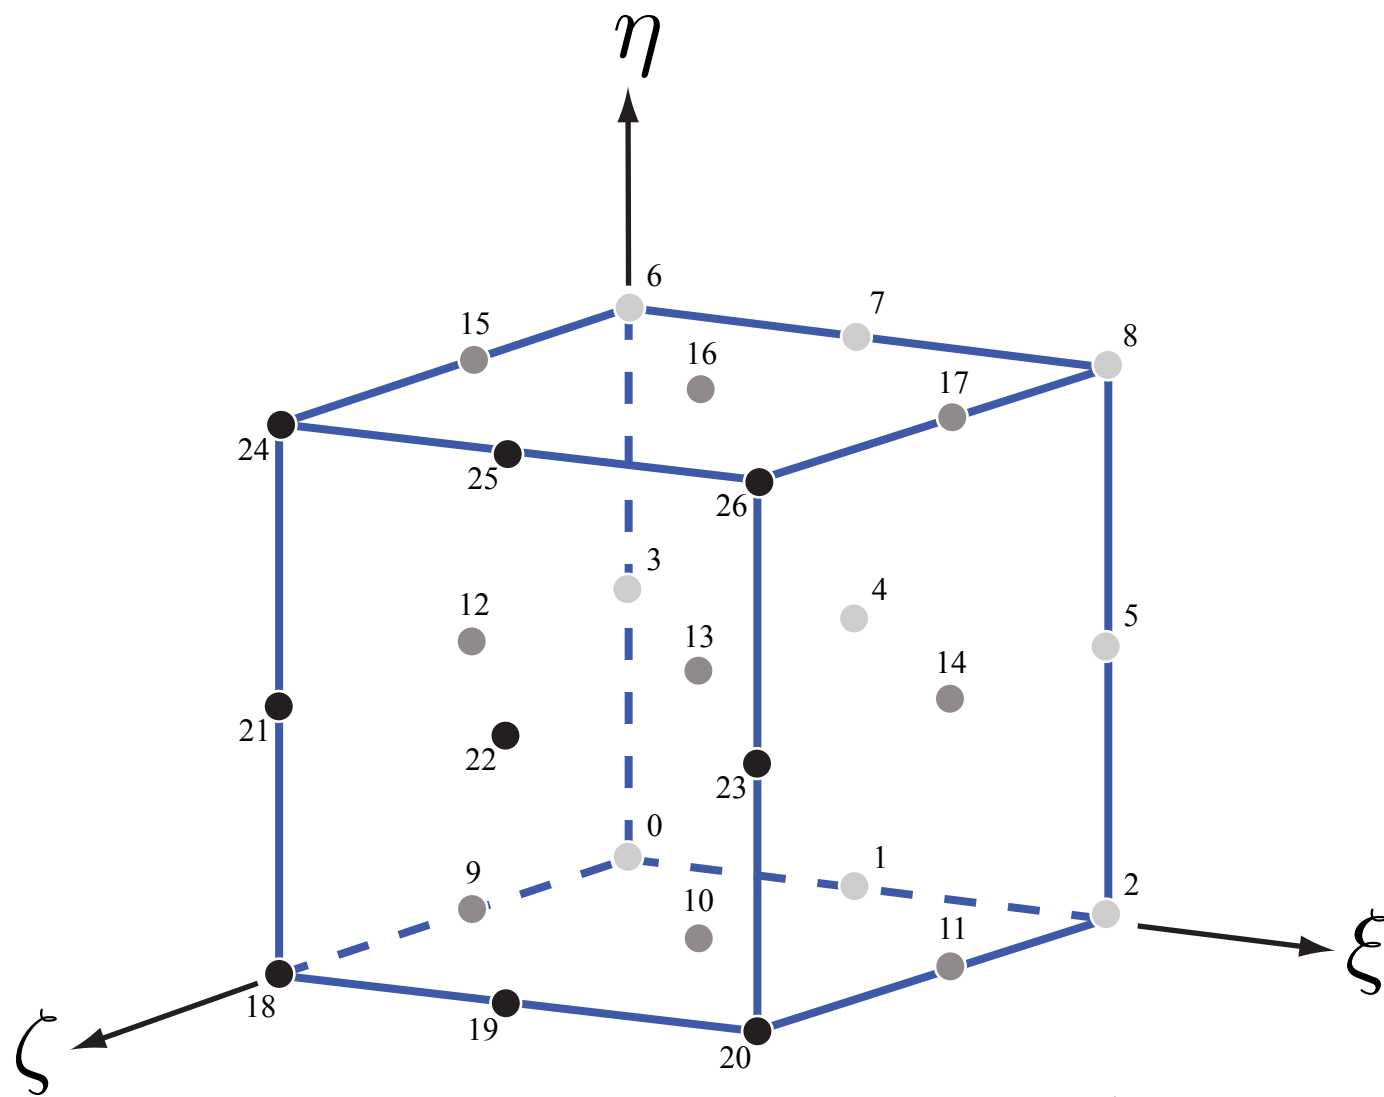

$$n = t_1 \times t_2$$

$$t_2 = n \times t_1$$

$$t_1 = t_2 \times n$$

$$\xi^+ = \{2, 5, 8 - 11, 14, 17 - 20, 23, 26\}$$

$$\xi^- = \{6, 3, 0 - 15, 12, 9 - 24, 21, 18\}$$

$$\eta^+ = \{8, 7, 6 - 17, 16, 15 - 26, 25, 24\}$$

$$\eta^- = \{0, 1, 2 - 8, 10, 11 - 18, 19, 20\}$$

$$\zeta^+ = \{18, 19, 20 - 21, 22, 23 - 24, 25, 26\}$$

$$\zeta^- = \{2, 1, 0 - 5, 4, 3 - 8, 7, 6\}$$

Supplement: Supplementary file 7 [file se-2022-7-supplement.zip]

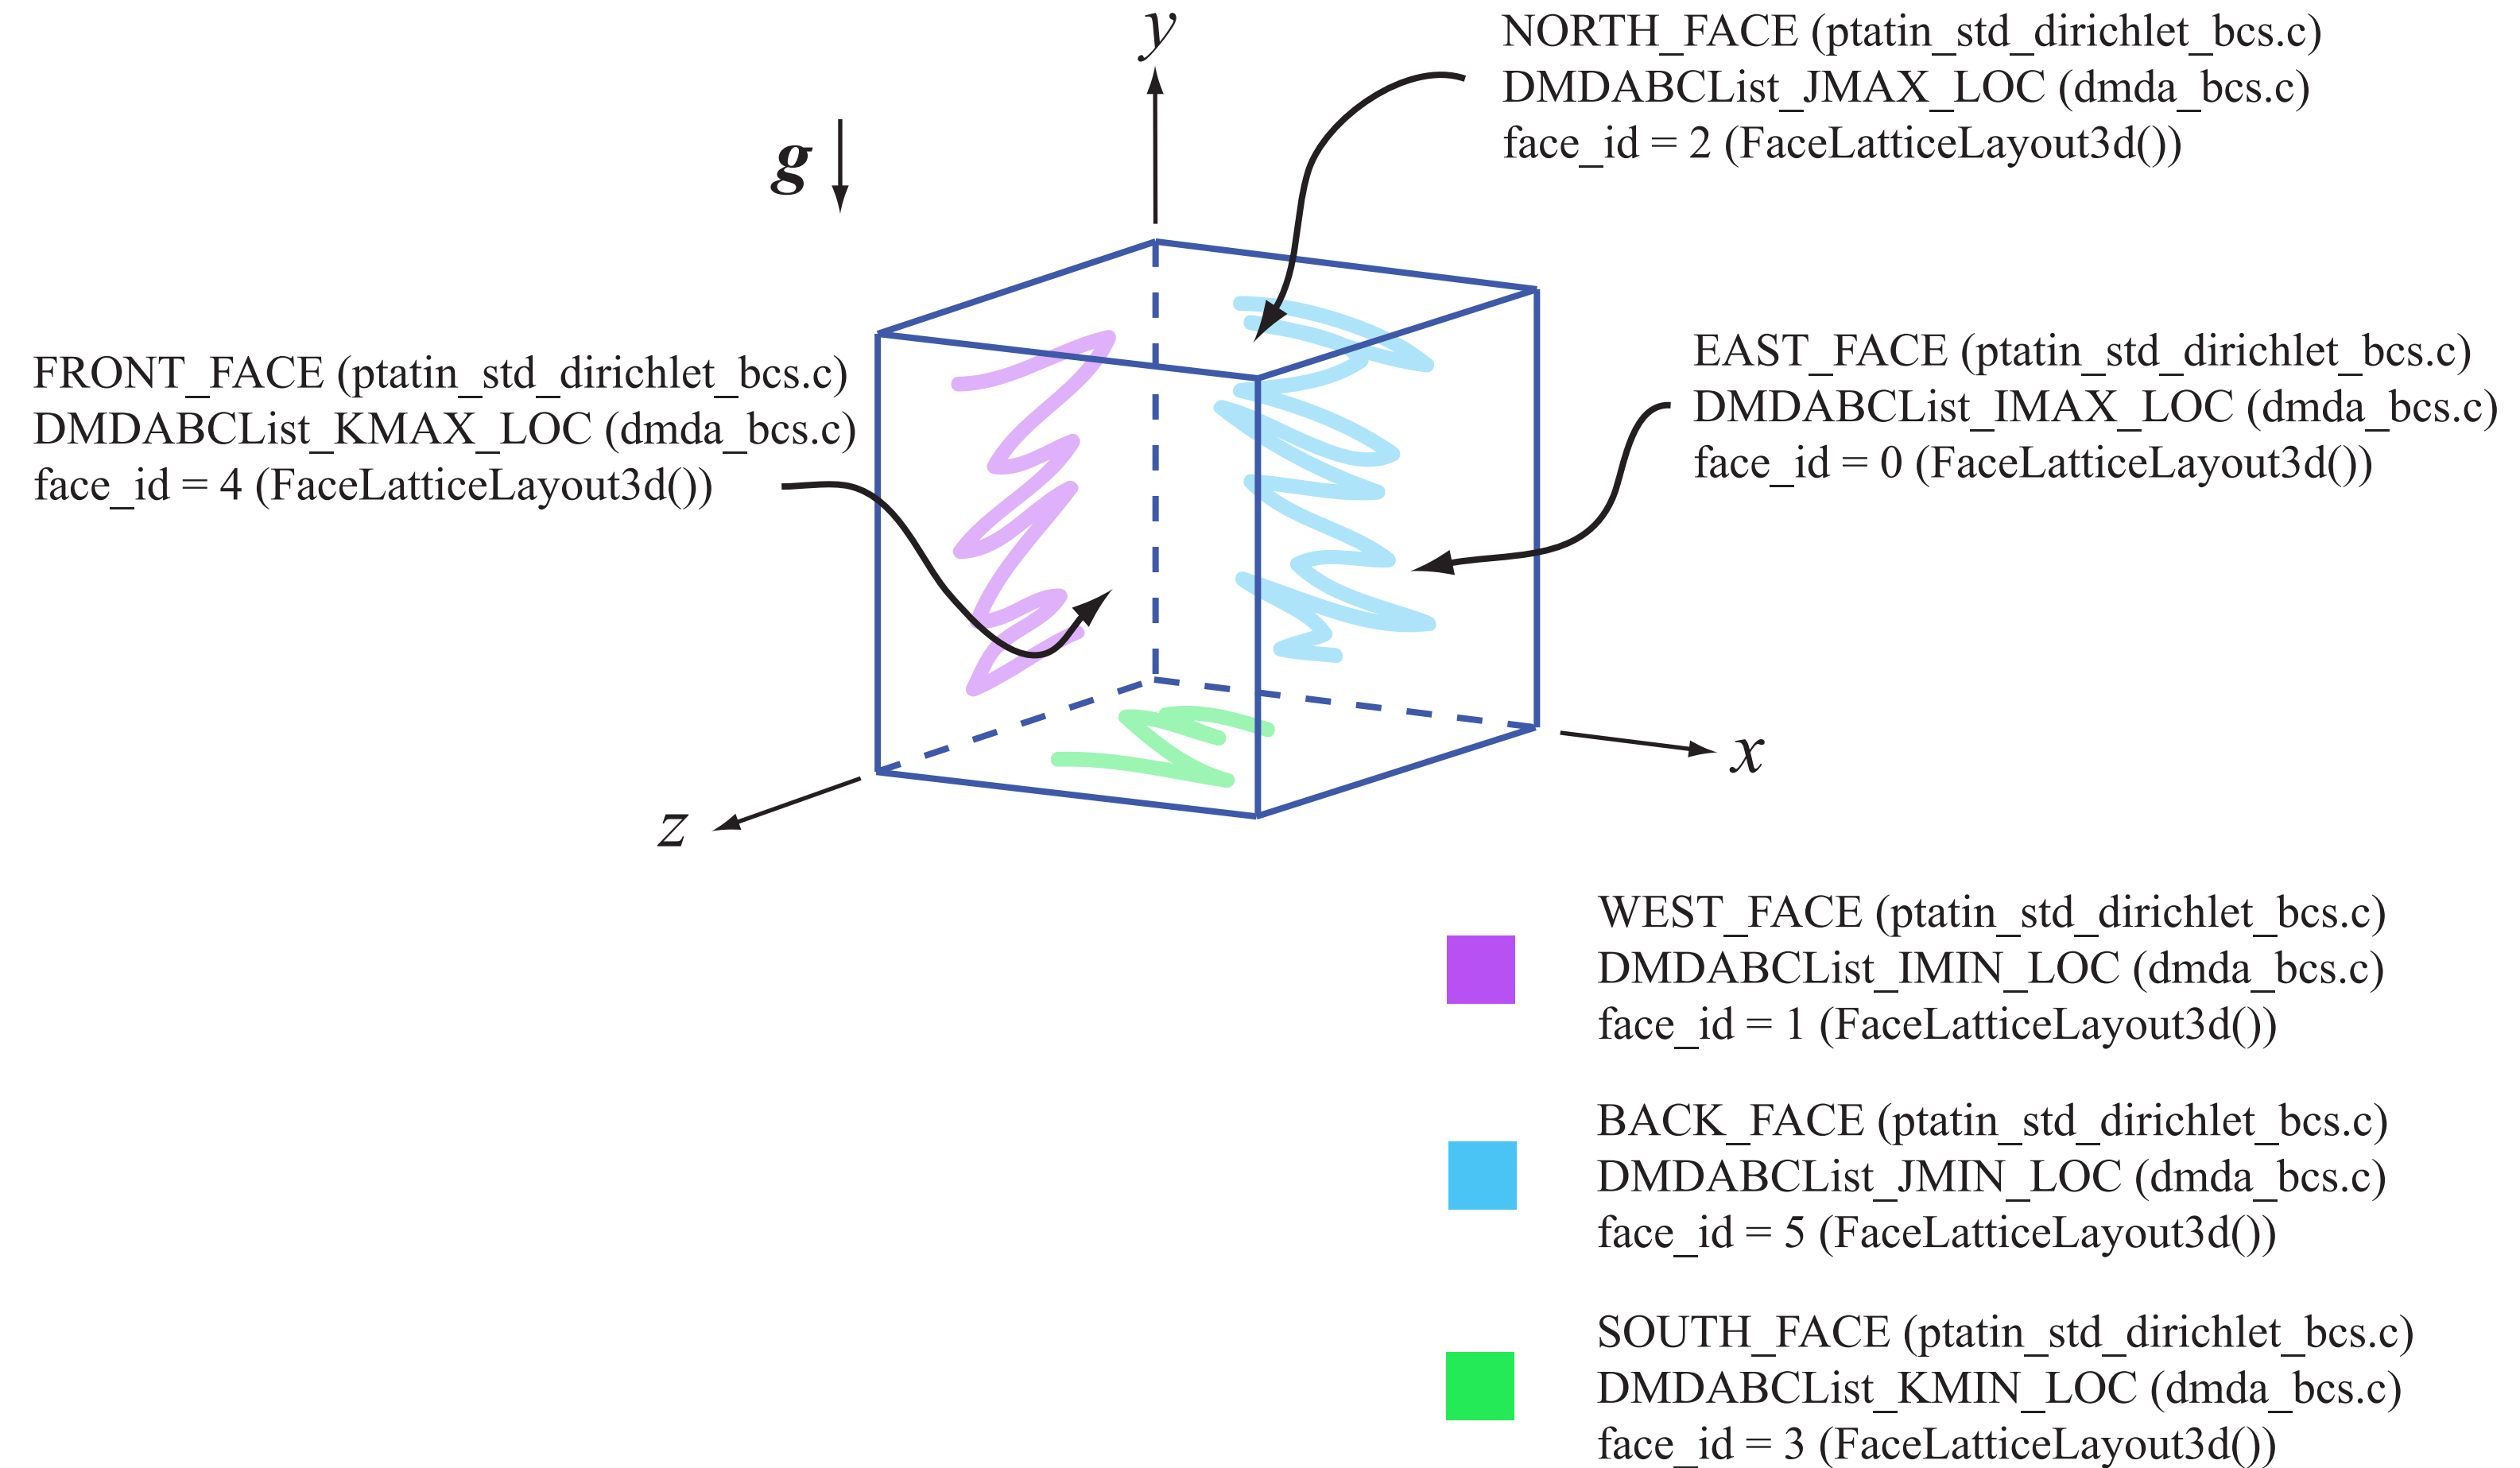

Supplement: Supplementary file 9 [file se-2022-7-supplement.zip]
